# Supplementary material for: In Silico Safety Assessment of Bacillus Isolated from Polish Bee Pollen and Bee Bread as Novel Probiotic Candidates
Source: MDPI journal article supplement (doi:10.3390/ijms25010666), 2024-01-04
Supplement: s1 [file s1]

# ***In Silico* Safety Assessment of *Bacillus* isolated from Polish Bee Pollen and Bee Bread as Novel Probiotic Candidates**

Ahmer Bin Hafeez<sup>1</sup>; Karolina Pełka<sup>1</sup>; Randy Worobo<sup>2</sup>; Piotr Szweda<sup>1\*</sup>

1 - Department of Pharmaceutical Technology and Biochemistry, Faculty of Chemistry, Gdańsk University of Technology, ul. G. Narutowicza 11/12, 80-233 Gdańsk, Poland;

2 - Department of Food Science, Cornell University, Ithaca, NY 14853, USA

Ahmer Bin Hafeez – e-mail: [ahmer.bin.hafeez@pg.edu.pl](mailto:ahmer.bin.hafeez@pg.edu.pl); ORCID: 0000-0002-8712-5898

Karolina Pełka – e-mail: [karolina.pelka@pg.edu.pl](mailto:karolina.pelka@pg.edu.pl); ORCID: 0000-0003-2523-8165

Randy Worobo – e-mail: [rww8@cornell.edu](mailto:rww8@cornell.edu); ORCID: 0000-0002-5211-3125

Piotr Szweda – email: [piotr.szweda@pg.edu.pl](mailto:piotr.szweda@pg.edu.pl); ORCID: 0000-0001-8291-5148\*

**Table S1.** Insertion sequence (IS) elements in genomes of the isolates

| IS Element             | IS Family | Group | Score (bits) | Size (bp) | E. value | Identity % | Inverted repeats (bp) | Direct repeats (bp) | ORF | Function    | Origin                 | Accession number | COMMENTS                                                                                                                               |
|------------------------|-----------|-------|--------------|-----------|----------|------------|-----------------------|---------------------|-----|-------------|------------------------|------------------|----------------------------------------------------------------------------------------------------------------------------------------|
| <b>Isolate BB10.1</b>  |           |       |              |           |          |            |                       |                     |     |             |                        |                  |                                                                                                                                        |
| ISBpu1                 | IS1182    |       | 121          | 1709      | 3.00E-24 | 84%        | 14/15                 | 30                  | 1   | Transposase | <i>B. pumilus</i>      | NC_009848        | ISBpu1 is 82% aa similar to ISBcl1.                                                                                                    |
| ISBsu1                 | IS3       | IS150 | 69.9         | 1289      | 8.00E-09 | 95%        | 32/42                 | 2, 3, 3, 3, 2       | 3   | Transposase | <i>B. subtilis</i>     | NC_014479        | ISBsu1 is 71% aa similar to ISLmo1. The third ORF is the putative ORFAB transposase reconstructed in silico by possible -1 frameshift. |
| ISBpu1                 | IS1182    |       | 87.8         | 1709      | 3.00E-14 | 85%        | 14/15                 | 30                  | 1   | Transposase | <i>B. pumilus</i>      | NC_009848        | ISBpu1 is 82% aa similar to ISBcl1.                                                                                                    |
| ISBpu1                 | IS1182    |       | 103          | 1709      | 2.00E-19 | 83%        | 14/15                 | 30                  | 1   | Transposase | <i>B. pumilus</i>      | NC_009848        | ISBpu1 is 82% aa similar to ISBcl1.                                                                                                    |
| ISBpu1                 | IS1182    |       | 79.8         | 1709      | 2.00E-12 | 84%        | 14/15                 | 30                  | 1   | Transposase | <i>B. pumilus</i>      | NC_009848        | ISBpu1 is 82% aa similar to ISBcl1.                                                                                                    |
| ISBpu1                 | IS1182    |       | 63.9         | 1709      | 1.00E-07 | 93%        | 14/15                 | 30                  | 1   | Transposase | <i>B. pumilus</i>      | NC_009848        | ISBpu1 is 82% aa similar to ISBcl1.                                                                                                    |
| ISBpu1                 | IS1182    |       | 103          | 1709      | 7.00E-20 | 86%        | 14/15                 | 30                  | 1   | Transposase | <i>B. pumilus</i>      | NC_009848        | ISBpu1 is 82% aa similar to ISBcl1.                                                                                                    |
| ISBspe1                | IS1182    |       | 61.9         | 1560      | 3.00E-07 | 86%        | 13/15                 | 23                  | 1   | Transposase | <i>B. pseudofirmus</i> | NC_013791        | ISBspe1 is 79% aa similar to ISOih1.                                                                                                   |
| <b>Isolate BP20.15</b> |           |       |              |           |          |            |                       |                     |     |             |                        |                  |                                                                                                                                        |
| ISBsu1                 | IS3       | IS150 | 69.9         | 1289      | 3.00E-09 | 95%        | 32/42                 | 2, 3, 3, 3, 2       | 3   | Transposase | <i>B. subtilis</i>     | NC_014479        | ISBsu1 is 71% aa similar to ISLmo1. The third ORF is the putative ORFAB transposase reconstructed in silico by possible -1 frameshift. |
| ISBpu1                 | IS3       | IS150 | 103          | 1709      | 1.00E-19 | 83%        | 14/15                 | 30                  | 1   | Transposase | <i>B. pumilus</i>      | NC_009848        | ISBpu1 is 82% aa similar to ISBcl1.                                                                                                    |
| ISBpu1                 | IS3       | IS150 | 87.7         | 1709      | 4.00E-15 | 85%        | 14/15                 | 30                  | 1   | Transposase | <i>B. pumilus</i>      | NC_009848        | ISBpu1 is 82% aa similar to ISBcl1.                                                                                                    |
| ISBpu1                 | IS3       | IS150 | 103          | 1709      | 6.00E-20 | 86%        | 14/15                 | 30                  | 1   | Transposase | <i>B. pumilus</i>      | NC_009848        | ISBpu1 is 82% aa similar to ISBcl1.                                                                                                    |
| ISBpu1                 | IS3       | IS150 | 60           | 1709      | 5.00E-07 | 97%        | 14/15                 | 30                  | 1   | Transposase | <i>B. pumilus</i>      | NC_009848        | ISBpu1 is 82% aa similar to ISBcl1.                                                                                                    |
| ISBpu1                 | IS3       | IS150 | 89.7         | 1709      | 2.00E-16 | 85%        | 14/15                 | 30                  | 1   | Transposase | <i>B. pumilus</i>      | NC_009848        | ISBpu1 is 82% aa similar to ISBcl1.                                                                                                    |

|                      |     |       |      |      |          |     |       |                  |   |             |                      |           |                                                                                                                                       |
|----------------------|-----|-------|------|------|----------|-----|-------|------------------|---|-------------|----------------------|-----------|---------------------------------------------------------------------------------------------------------------------------------------|
| ISBpu1               | IS3 | IS150 | 81.8 | 1709 | 3.00E-16 | 84% | 14/15 | 30               | 1 | Transposase | <i>B. pumilus</i>    | NC_009848 | ISBpu1 is 82% aa similar to ISBcl1.                                                                                                   |
| <b>Isolate PY2.3</b> |     |       |      |      |          |     |       |                  |   |             |                      |           |                                                                                                                                       |
| ISBsu1               | IS3 | IS150 | 133  | 1289 | 4.00E-28 | 93% | 32/42 | 2, 3, 3, 3,<br>2 | 3 | Transposase | <i>B. subtilis</i>   | NC_014479 | ISBsu1 is 71% aa similar to ISLmo1. The third ORF is the putative ORFAB transposase reconstructed in silico by possible -1 frameshift |
| ISBsu1               | IS3 | IS150 | 73.8 | 1289 | 2.00E-10 | 93% | 32/42 | 2, 3, 3, 3,<br>2 | 3 | Transposase | <i>B. subtilis</i>   | NC_014479 | ISBsu1 is 71% aa similar to ISLmo1. The third ORF is the putative ORFAB transposase reconstructed in silico by possible -1 frameshift |
| ISBsu1               | IS3 | IS150 | 73.8 | 1289 | 1.00E-10 | 93% | 32/42 | 2, 3, 3, 3,<br>2 | 3 | Transposase | <i>B. subtilis</i>   | NC_014479 | ISBsu1 is 71% aa similar to ISLmo1. The third ORF is the putative ORFAB transposase reconstructed in silico by possible -1 frameshift |
| IS655                | IS3 |       | 65.9 | 1221 | 3.00E-08 | 93% | 9/15  | 3                | 3 | Transposase | <i>B. halodurans</i> | NC_002570 | There are 5 copies of IS655 on Bacillus halodurans chromosome                                                                         |
| ISBsu1               | IS3 | IS150 | 75.8 | 1289 | 3.00E-11 | 93% | 32/42 | 2, 3, 3, 3,<br>2 | 3 | Transposase | <i>B. subtilis</i>   | NC_014479 | ISBsu1 is 71% aa similar to ISLmo1. The third ORF is the putative ORFAB transposase reconstructed in silico by possible -1 frameshift |
| ISBsu1               | IS3 | IS150 | 107  | 1289 | 6.00E-21 | 97% | 32/42 | 2, 3, 3, 3,<br>2 | 3 | Transposase | <i>B. subtilis</i>   | NC_014479 | ISBsu1 is 71% aa similar to ISLmo1. The third ORF is the putative ORFAB transposase reconstructed in silico by possible -1 frameshift |
| ISBsu1               | IS3 | IS150 | 107  | 1289 | 5.00E-21 | 97% | 32/42 | 2, 3, 3, 3,<br>2 | 3 | Transposase | <i>B. subtilis</i>   | NC_014479 | ISBsu1 is 71% aa similar to ISLmo1.                                                                                                   |

|        |     |       |      |      |          |     |       |               |   |             |                               |           |                                                                                                                                                   |
|--------|-----|-------|------|------|----------|-----|-------|---------------|---|-------------|-------------------------------|-----------|---------------------------------------------------------------------------------------------------------------------------------------------------|
|        |     |       |      |      |          |     |       |               |   |             |                               |           | The third ORF is the putative ORFAB transposase reconstructed in silico by possible -1 frameshift                                                 |
| ISBsu1 | IS3 | IS150 | 1402 | 1289 | 0.00E+00 | 97% | 32/42 | 2, 3, 3, 3, 2 | 3 | Transposase | <i>B. subtilis</i>            | NC_014479 | ISBsu1 is 71% aa similar to ISLmo1. The third ORF is the putative ORFAB transposase reconstructed in silico by possible -1 frameshift             |
| ISLmo1 | IS3 | IS150 | 50.1 | 1228 | 6.00E-06 | 94% | 33/49 | 0             | 3 | Transposase | <i>Listeria monocytogenes</i> | NC_003210 | ISLmo1 is 81% (ORFA) and 72% (ORFB) aa similar to ISSau4. The third ORF is a putative ORFAB transposase reconstructed in silico by -1 frameshift. |

**Table S2.** List of the KEGG pathways related to the biosynthesis of antimicrobial drugs with clinical importance in the genomes of the isolates BB10.1, 20.15, PY2.3.

| map_ID                                          | map_Name                                     | Products                                                                                                                      |
|-------------------------------------------------|----------------------------------------------|-------------------------------------------------------------------------------------------------------------------------------|
| <b>Metabolism of terpenoids and polyketides</b> |                                              |                                                                                                                               |
| map01054                                        | Nonribosomal peptide structures              | Lichenysin, fengycin, and surfactin                                                                                           |
| map01055                                        | Biosynthesis of vancomycin group antibiotics | Vancomycin                                                                                                                    |
| map00900                                        | Terpenoid backbone biosynthesis              | Essential oil monoterpenes and linalyl acetate, sesquiterpenes, diterpenes, triterpenes, and carotenoids, phytol and sterols. |
| map00906                                        | Carotenoid biosynthesis                      | beta-carotene                                                                                                                 |
| map00981                                        | Insect hormone biosynthesis                  | Juvenile hormone                                                                                                              |
| map00908                                        | Zeatin biosynthesis                          | Zeatin                                                                                                                        |

|                                                    |                                                         |                                                                                                                                             |
|----------------------------------------------------|---------------------------------------------------------|---------------------------------------------------------------------------------------------------------------------------------------------|
| map00903                                           | Limonene and pinene degradation                         | Multiple products                                                                                                                           |
| map00281                                           | Geraniol degradation                                    | Geranoil byproducts                                                                                                                         |
| map01051                                           | Biosynthesis of ansamycins                              | Rifamycin                                                                                                                                   |
| map00523                                           | Polyketide sugar unit biosynthesis                      | Multiple products                                                                                                                           |
| map01053                                           | Biosynthesis of siderophore group nonribosomal peptides | Bacillibactin                                                                                                                               |
| <b>Biosynthesis of other secondary metabolites</b> |                                                         |                                                                                                                                             |
| map00940                                           | Phenylpropanoid biosynthesis                            | Monolignol                                                                                                                                  |
| map00950                                           | Isoquinoline alkaloid biosynthesis                      | Naringenin                                                                                                                                  |
| map00960                                           | Tropane, piperidine and pyridine alkaloid biosynthesis  | Reticuline, morphine, sanguinarine, noscapine                                                                                               |
| map00232                                           | Caffeine metabolism                                     | Xanthine                                                                                                                                    |
| map00966                                           | Glucosinolate biosynthesis                              | Glucobrassicin                                                                                                                              |
| map00311                                           | Penicillin and cephalosporin biosynthesis               | Penicillin, cephamycin C                                                                                                                    |
| map00332                                           | Carbapenem biosynthesis                                 | Carbapenem                                                                                                                                  |
| map00261                                           | Monobactam biosynthesis                                 | nocardicin A                                                                                                                                |
| map00521                                           | Streptomycin biosynthesis                               | Streptomycin (INN)                                                                                                                          |
| map00524                                           | Neomycin, kanamycin and gentamicin biosynthesis         | Tobramycin (JP18/USP), Apramycin (USAN/INN), Framycetin (INN), Paromomycin (INN), Bekanamycin (INN), Micronomicin (DCF), Ribostamycin (INN) |
| map00525                                           | Acarbose and validamycin biosynthesis                   | validamycin A                                                                                                                               |
| map00401                                           | Novobiocin biosynthesis                                 | Coumermycin (USAN)                                                                                                                          |
| map00405                                           | Phenazine biosynthesis                                  | pyocyanine                                                                                                                                  |
| map00333                                           | Prodigiosin biosynthesis                                | Prodigiosin, undecylprodigiosin                                                                                                             |
| map00998                                           | Biosynthesis of various antibiotics                     | Kanosamine, Aurachin, Bacilysin, Puromycin, Dapdiamides, Fosfomycin, Cremeomycin, Pentalenolactone, Terpentecin, Roseoflavin, Cycloserine   |
| map00999                                           | Biosynthesis of various plant secondary metabolites     | Crocin, Cannabidiol, Mugineic acid, Pentagalloylglucose, Benzoxazinoid, Gramine, Coumarin, Furanocoumarin, Hordatine, Podophyllotoxin       |

**Table S3.** CARD database results for the antibiotic resistance genes in the genome of the isolates.

| Contig                | Start  | Stop   | Orientation | Cut_Off | Pass_Bitscore | Best_Hit_Bitscore | Best_Hit_ARO              | Best_Identities | ARO     | Drug Class                                                              | Resistance Mechanism         | AMR Gene Family                                            |
|-----------------------|--------|--------|-------------|---------|---------------|-------------------|---------------------------|-----------------|---------|-------------------------------------------------------------------------|------------------------------|------------------------------------------------------------|
| <b>Isolate BB10.1</b> |        |        |             |         |               |                   |                           |                 |         |                                                                         |                              |                                                            |
| lcl NODE1_51          | 51517  | 51951  | -           | Strict  | 150           | 183               | FosBx1                    | 62.04           | 3007372 | phosphonic acid antibiotic                                              | antibiotic inactivation      | fosfomycin thiol transferase                               |
| lcl NODE1_74          | 69489  | 70673  | +           | Strict  | 175           | 213               | vanT gene in vanG cluster | 34.05           | 3002972 | glycopeptide antibiotic                                                 | antibiotic target alteration | glycopeptide resistance gene cluster; vanT                 |
| lcl NODE1_162         | 145443 | 145760 | +           | Strict  | 75            | 97.8              | qacJ                      | 46.46           | 3007014 | disinfecting agents and antiseptics                                     | antibiotic efflux            | small multidrug resistance (SMR) antibiotic efflux pump    |
| lcl NODE1_163         | 145774 | 146127 | +           | Strict  | 75            | 94.4              | qacJ                      | 44.9            | 3007014 | disinfecting agents and antiseptics                                     | antibiotic efflux            | small multidrug resistance (SMR) antibiotic efflux pump    |
| lcl NODE1_595         | 633647 | 633964 | -           | Perfect | 180           | 205.7             | ykkD                      | 100             | 3003064 | aminoglycoside antibiotic; tetracycline antibiotic; phenicol antibiotic | antibiotic efflux            | small multidrug resistance (SMR) antibiotic efflux pump    |
| lcl NODE1_596         | 633964 | 634302 | -           | Perfect | 180           | 220.7             | ykkC                      | 100             | 3003063 | aminoglycoside antibiotic; tetracycline antibiotic; phenicol antibiotic | antibiotic efflux            | small multidrug resistance (SMR) antibiotic efflux pump    |
| lcl NODE2_42          | 46909  | 47820  | -           | Strict  | 50            | 119               | vanW gene in vanI cluster | 37.87           | 3003724 | glycopeptide antibiotic                                                 | antibiotic target alteration | vanW; glycopeptide resistance gene cluster                 |
| lcl NODE2_50          | 53514  | 54434  | +           | Strict  | 350           | 405.2             | BcI                       | 65.7            | 3002877 | cephalosporin; penem                                                    | antibiotic inactivation      | class A Bacillus cereus Bc beta-lactamase                  |
| lcl NODE2_144         | 139548 | 140369 | -           | Strict  | 50            | 112.1             | vanY gene in vanG cluster | 35.37           | 3002959 | glycopeptide antibiotic                                                 | antibiotic target alteration | vanY; glycopeptide resistance gene cluster                 |
| lcl NODE2_662         | 587547 | 588749 | +           | Perfect | 750           | 740.7             | blt                       | 100             | 3003006 | fluoroquinolone antibiotic; disinfecting agents and antiseptics         | antibiotic efflux            | major facilitator superfamily (MFS) antibiotic efflux pump |
| lcl NODE2_682         | 606252 | 607106 | -           | Perfect | 500           | 596.3             | aadK                      | 100             | 3002627 | aminoglycoside antibiotic                                               | antibiotic inactivation      | ANT(6)                                                     |
| lcl NODE3_268         | 270249 | 270608 | -           | Strict  | 75            | 86.3              | qacG                      | 42.16           | 3007015 | disinfecting agents and antiseptics                                     | antibiotic efflux            | small multidrug resistance (SMR)                           |

|                |        |        |   |         |      |        |                           |       |         |                                                                              |                                    |                                                                                  |
|----------------|--------|--------|---|---------|------|--------|---------------------------|-------|---------|------------------------------------------------------------------------------|------------------------------------|----------------------------------------------------------------------------------|
|                |        |        |   |         |      |        |                           |       |         |                                                                              |                                    | antibiotic efflux pump                                                           |
| lcl NODE4_33   | 27386  | 29956  | - | Perfect | 1650 | 1635.2 | Bacillus subtilis mprF    | 100   | 3003324 | peptide antibiotic                                                           | antibiotic target alteration       | defensin resistant mprF                                                          |
| lcl NODE6_123  | 121545 | 122714 | + | Strict  | 175  | 186.8  | vanT gene in vanG cluster | 32.05 | 3002972 | glycopeptide antibiotic                                                      | antibiotic target alteration       | glycopeptide resistance gene cluster; vanT                                       |
| lcl NODE6_205  | 188399 | 190042 | - | Perfect | 1000 | 1063.1 | vmLR                      | 100   | 3004476 | lincosamide antibiotic; streptogramin antibiotic; streptogramin B antibiotic | antibiotic target protection       | Miscellaneous ABC-F subfamily ATP-binding cassette ribosomal protection proteins |
| lcl NODE7_95   | 99651  | 100571 | + | Perfect | 500  | 631.7  | mphK                      | 100   | 3004541 | macrolide antibiotic                                                         | antibiotic inactivation            | macrolide phosphotransferase (MPH)                                               |
| lcl NODE7_157  | 162969 | 163562 | - | Perfect | 375  | 401.4  | tmrB                      | 100   | 3003059 | nucleoside antibiotic                                                        | reduced permeability to antibiotic | tunicamycin resistance protein                                                   |
| lcl NODE8_97   | 90607  | 91983  | - | Strict  | 450  | 682.9  | tet(45)                   | 75.82 | 3003196 | tetracycline antibiotic                                                      | antibiotic efflux                  | major facilitator superfamily (MFS) antibiotic efflux pump                       |
| <b>BP20.15</b> |        |        |   |         |      |        |                           |       |         |                                                                              |                                    |                                                                                  |
| lcl l_439      | 384141 | 384962 | + | Strict  | 50   | 111.7  | vanY gene in vanM cluster | 34.55 | 3002961 | glycopeptide antibiotic                                                      | antibiotic target alteration       | vanY; glycopeptide resistance gene cluster                                       |
| lcl l_525      | 468553 | 469473 | - | Strict  | 350  | 408.7  | BcI                       | 66.02 | 3002877 | cephalosporin; penem                                                         | antibiotic inactivation            | class A Bacillus cereus Bc beta-lactamase                                        |
| lcl l_533      | 475198 | 476109 | + | Strict  | 50   | 119    | vanW gene in vanI cluster | 37.87 | 3003724 | glycopeptide antibiotic                                                      | antibiotic target alteration       | vanW; glycopeptide resistance gene cluster                                       |
| lcl 2_311      | 313264 | 314118 | + | Strict  | 500  | 585.9  | aadK                      | 98.24 | 3002627 | aminoglycoside antibiotic                                                    | antibiotic inactivation            | ANT(6)                                                                           |
| lcl 4_73       | 69148  | 70332  | + | Strict  | 175  | 212.6  | vanT gene in vanG cluster | 34.05 | 3002972 | glycopeptide antibiotic                                                      | antibiotic target alteration       | glycopeptide resistance gene cluster; vanT                                       |
| lcl 4_110      | 103150 | 103467 | + | Strict  | 75   | 97.8   | qacJ                      | 46.46 | 3007014 | disinfecting agents and antiseptics                                          | antibiotic efflux                  | small multidrug resistance (SMR) antibiotic efflux pump                          |
| lcl 4_111      | 103481 | 103834 | + | Strict  | 75   | 94.4   | qacJ                      | 44.9  | 3007014 | disinfecting agents and antiseptics                                          | antibiotic efflux                  | small multidrug resistance (SMR) antibiotic efflux pump                          |
| lcl 5_215      | 202890 | 203207 | - | Strict  | 180  | 203    | ykkD                      | 99.05 | 3003064 | aminoglycoside antibiotic;                                                   | antibiotic efflux                  | small multidrug resistance (SMR)                                                 |

|                      |        |        |   |         |      |       |                           |       |         |                                                                              |                                    |                                                                                  |
|----------------------|--------|--------|---|---------|------|-------|---------------------------|-------|---------|------------------------------------------------------------------------------|------------------------------------|----------------------------------------------------------------------------------|
|                      |        |        |   |         |      |       |                           |       |         | tetracycline antibiotic; phenicol antibiotic                                 |                                    | antibiotic efflux pump                                                           |
| lcl 5_216            | 203207 | 203545 | - | Perfect | 180  | 220.7 | ykkC                      | 100   | 3003063 | aminoglycoside antibiotic; tetracycline antibiotic; phenicol antibiotic      | antibiotic efflux                  | small multidrug resistance (SMR) antibiotic efflux pump                          |
| lcl 7_39             | 46816  | 47409  | + | Strict  | 375  | 395.6 | tmrB                      | 97.97 | 3003059 | nucleoside antibiotic                                                        | reduced permeability to antibiotic | tunicamycin resistance protein                                                   |
| lcl 7_101            | 109799 | 110719 | - | Strict  | 500  | 624   | mphK                      | 98.69 | 3004541 | macrolide antibiotic                                                         | antibiotic inactivation            | macrolide phosphotransferase (MPH)                                               |
| lcl 14_72            | 70902  | 72278  | - | Strict  | 450  | 677.2 | tet(45)                   | 74.95 | 3003196 | tetracycline antibiotic                                                      | antibiotic efflux                  | major facilitator superfamily (MFS) antibiotic efflux pump                       |
| lcl 15_4             | 2364   | 3533   | + | Strict  | 175  | 187.2 | vanT gene in vanG cluster | 32.05 | 3002972 | glycopeptide antibiotic                                                      | antibiotic target alteration       | glycopeptide resistance gene cluster; vanT                                       |
| lcl 15_87            | 73116  | 74759  | - | Strict  | 1000 | 1042  | vmlR                      | 98.35 | 3004476 | lincosamide antibiotic; streptogramin antibiotic; streptogramin B antibiotic | antibiotic target protection       | Miscellaneous ABC-F subfamily ATP-binding cassette ribosomal protection proteins |
| lcl 20_21            | 16958  | 17317  | + | Strict  | 75   | 86.3  | qacG                      | 42.16 | 3007015 | disinfecting agents and antiseptics                                          | antibiotic efflux                  | small multidrug resistance (SMR) antibiotic efflux pump                          |
| <b>Isolate PY2.3</b> |        |        |   |         |      |       |                           |       |         |                                                                              |                                    |                                                                                  |
| lcl 1_307            | 332022 | 332936 | - | Strict  | 350  | 391.3 | BcI                       | 63.07 | 3002877 | cephalosporin; penem                                                         | antibiotic inactivation            | class A <i>B. cereus</i> Bc beta-lactamase                                       |
| lcl 2_512            | 505358 | 506539 | - | Strict  | 175  | 202.2 | vanT gene in vanG cluster | 33.96 | 3002972 | glycopeptide antibiotic                                                      | antibiotic target alteration       | glycopeptide resistance gene cluster; vanT                                       |
| lcl 3_126            | 161457 | 161771 | + | Strict  | 75   | 82.8  | qacJ                      | 37.37 | 3007014 | disinfecting agents and antiseptics                                          | antibiotic efflux                  | small multidrug resistance (SMR) antibiotic efflux pump                          |
| lcl 3_127            | 161789 | 162142 | + | Strict  | 75   | 93.2  | qacJ                      | 44.9  | 3007014 | disinfecting agents and antiseptics                                          | antibiotic efflux                  | small multidrug resistance (SMR) antibiotic efflux pump                          |

|            |        |        |   |        |     |       |                           |       |         |                                                                                                                                                       |                              |                                                         |
|------------|--------|--------|---|--------|-----|-------|---------------------------|-------|---------|-------------------------------------------------------------------------------------------------------------------------------------------------------|------------------------------|---------------------------------------------------------|
| lcl 10_26  | 25546  | 25911  | - | Strict | 75  | 79.7  | qacG                      | 42.45 | 3007015 | disinfecting agents and antiseptics                                                                                                                   | antibiotic efflux            | small multidrug resistance (SMR) antibiotic efflux pump |
| lcl 10_53  | 49262  | 50431  | + | Strict | 175 | 192.2 | vanT gene in vanG cluster | 34.25 | 3002972 | glycopeptide antibiotic                                                                                                                               | antibiotic target alteration | glycopeptide resistance gene cluster; vanT              |
| lcl 10_138 | 115803 | 116852 | + | Strict | 600 | 701   | clbA                      | 99.43 | 3002814 | lincosamide antibiotic; streptogramin antibiotic; streptogramin A antibiotic; oxazolidinone antibiotic; phenicol antibiotic; pleuromutilin antibiotic | antibiotic target alteration | Cfr 23S ribosomal RNA methyltransferase                 |
| lcl 10_191 | 164755 | 165069 | - | Strict | 75  | 75.1  | qacG                      | 37.25 | 3007015 | disinfecting agents and antiseptics                                                                                                                   | antibiotic efflux            | small multidrug resistance (SMR) antibiotic efflux pump |
| lcl 12_48  | 36737  | 37555  | + | Strict | 50  | 105.9 | vanY gene in vanB cluster | 34.87 | 3002956 | glycopeptide antibiotic                                                                                                                               | antibiotic target alteration | vanY; glycopeptide resistance gene cluster              |

**Table S4.** VirulenceFinder database results for virulence genes in the isolates BB 10.1, BP 20.15 and PY2.3 genomes

| VFclass        | Virulence factors                                       | Related genes | Isolate BB10.1 | <i>B.subtilis</i> subsp. subtilis str. 168 |
|----------------|---------------------------------------------------------|---------------|----------------|--------------------------------------------|
|                |                                                         |               | draft          | chromosome (NC_000964)                     |
| Adherence      | BslA                                                    | bslA          | -              | -                                          |
| Enzyme         | Sphingomyelinase (SMase)                                | sph           | -              | -                                          |
|                | Phosphatidylinositol-specific phospholipase C (PI-PLC)  | piplc         | -              | -                                          |
|                | Phosphatidylcholine-preferring phospholipase C (PC-PLC) | plcA          | -              | -                                          |
|                | Immune inhibitor A metalloproteinase                    | Undetermined  | -              | -                                          |
|                |                                                         | inhA          | -              | -                                          |
| Immune evasion | Polysaccharide capsule                                  | Undetermined  | -              | -                                          |
|                | Polyglutamic acid capsule                               | capA          | pgaptmp_002865 | BSU35880                                   |
|                |                                                         | capB          | pgaptmp_002867 | BSU35900                                   |
|                |                                                         | capC          | pgaptmp_002866 | BSU35890                                   |
|                |                                                         | capD          | pgaptmp_001187 | BSU18410                                   |
|                |                                                         | capE          | -              | -                                          |
|                | Hyaluronic acid (HA) capsule                            | hasA          | -              | -                                          |
|                |                                                         | hasB          | -              | -                                          |
|                |                                                         | hasC          | -              | -                                          |
|                | <i>B. cereus</i> exo-polysaccharide (BPS)               | bpsA          | -              | -                                          |
|                |                                                         | bpsB          | -              | -                                          |
|                |                                                         | bpsC          | -              | -                                          |
|                |                                                         | bpsD          | -              | -                                          |
|                |                                                         | bpsE          | -              | -                                          |
|                |                                                         | bpsF          | -              | -                                          |

|                  |                           |          |                |          |
|------------------|---------------------------|----------|----------------|----------|
|                  |                           | bpsG     | -              | -        |
|                  |                           | bpsH     | -              | -        |
|                  |                           | bpsX     | -              | -        |
| Iron acquisition | Petrobactin               | asbA     | -              | -        |
|                  |                           | asbB     | -              | -        |
|                  |                           | asbC     | -              | -        |
|                  |                           | asbD     | -              | -        |
|                  |                           | asbE     | -              | -        |
|                  |                           | asbF     | -              | -        |
|                  | IlsA                      | ilsA     | -              | -        |
|                  | Hal                       | hal      | -              | -        |
|                  | Bacillibactin             | dhbA     | pgaptmp_002461 | BSU32000 |
|                  |                           | dhbB     | pgaptmp_002458 | BSU31970 |
|                  |                           | dhbC     | pgaptmp_002460 | BSU31990 |
|                  |                           | dhbE     | pgaptmp_002459 | BSU31980 |
|                  |                           | dhbF     | pgaptmp_002457 | BSU31960 |
| Regulation       | PlcR-PapR quorum sensing  | papR     | -              | -        |
|                  |                           | plcR     | -              | -        |
|                  | PagR-XO2                  | pagR-XO2 | -              | -        |
|                  | PagR-XO1                  | pagR-XO1 | -              | -        |
|                  | AtxA                      | atxA     | -              | -        |
|                  | AcpAB                     | acpA     | -              | -        |
|                  |                           | acpB     | -              | -        |
| Secretion system | Type VII secretion system | -        | -              | -        |
|                  |                           | -        | -              | -        |
|                  |                           | essC     | -              | -        |

|       |                                        |              |                |          |
|-------|----------------------------------------|--------------|----------------|----------|
| Toxin |                                        | esxB         | -              | -        |
|       |                                        | esxL         | -              | -        |
|       | Non-hemolytic enterotoxin (Nhe)        | nheA         | -              | -        |
|       |                                        | nheB         | -              | -        |
|       |                                        | nheC         | -              | -        |
|       | Insecticidal crystalline toxins        | cry          | -              | -        |
|       |                                        | cyt          | -              | -        |
|       |                                        | vip          | -              | -        |
|       | Hemolytic enterotoxin HBL              | hblA         | -              | -        |
|       |                                        | hblC         | -              | -        |
|       |                                        | hblD         | -              | -        |
|       | Hemolysin III homolog                  | Undetermined | -              | -        |
|       | Hemolysin III                          | hlyIII       | pgaptmp_001360 | BSU21790 |
|       | Hemolysin II                           | hlyII        | -              | -        |
|       | Cytotoxin K (Hemolysin IV)             | cytK         | -              | -        |
|       | Certhrax                               | cer          | -              | -        |
|       | Cereulide                              | cesA         | -              | -        |
|       |                                        | cesB         | -              | -        |
|       |                                        | cesC         | -              | -        |
|       |                                        | cesD         | -              | -        |
|       |                                        | cesH         | -              | -        |
|       |                                        | cesP         | -              | -        |
|       |                                        | cesT         | -              | -        |
|       | Anthrolysin O/Cereolysin O/Hemolysin I | alo          | -              | -        |
|       | Anthrax toxin                          | cya          | -              | -        |
|       |                                        | lef          | -              | -        |

|  |  |      |   |   |
|--|--|------|---|---|
|  |  | pagA | - | - |
|--|--|------|---|---|

| VFclass        | Virulence factors                                       | Related genes | BP20.15 (Prediction)                                                                                                                                                                                                                               | B.subtilis subsp. subtilis str. 168 |
|----------------|---------------------------------------------------------|---------------|----------------------------------------------------------------------------------------------------------------------------------------------------------------------------------------------------------------------------------------------------|-------------------------------------|
|                |                                                         |               | draft (draft)                                                                                                                                                                                                                                      | chromosome (NC_000964)              |
| Adherence      | Flagella(Pseudomonas)                                   | fliP          | pgaptmp_000987                                                                                                                                                                                                                                     | -                                   |
|                | Fibronectin-binding protein(Listeria)                   | fbpA          | pgaptmp_000915                                                                                                                                                                                                                                     | -                                   |
|                | D-alanine-polyphosphoribitol ligase(Listeria)           | dltA          | pgaptmp_000589                                                                                                                                                                                                                                     | -                                   |
|                | BslA                                                    | bslA          | -                                                                                                                                                                                                                                                  | -                                   |
| Enzyme         | Serine-threonine phosphatase(Listeria)                  | stp           | pgaptmp_000927                                                                                                                                                                                                                                     | -                                   |
|                | Sphingomyelinase (SMase)                                | sph           | -                                                                                                                                                                                                                                                  | -                                   |
|                | Phosphatidylinositol-specific phospholipase C (PI-PLC)  | piplc         | -                                                                                                                                                                                                                                                  | -                                   |
|                | Phosphatidylcholine-preferring phospholipase C (PC-PLC) | plcA          | -                                                                                                                                                                                                                                                  | -                                   |
|                | Immune inhibitor A metalloproteinase                    | Undetermined  | -                                                                                                                                                                                                                                                  | -                                   |
|                |                                                         | inhA          | -                                                                                                                                                                                                                                                  | -                                   |
| Immune evasion | Polysaccharide capsule                                  | Undetermined  | pgaptmp_000779;<br>pgaptmp_000790;<br>pgaptmp_000791;<br>pgaptmp_001361;<br>pgaptmp_002843;<br>pgaptmp_002923;<br>pgaptmp_003428;<br>pgaptmp_003439;<br>pgaptmp_003458;<br>pgaptmp_003503;<br>pgaptmp_003504;<br>pgaptmp_003505;<br>pgaptmp_003506 | -                                   |
|                | Polyglutamic acid capsule                               | capA          | pgaptmp_003467                                                                                                                                                                                                                                     | BSU35880                            |

|                  |                                    |      |                |          |
|------------------|------------------------------------|------|----------------|----------|
|                  |                                    | capB | pgaptmp_003469 | BSU35900 |
|                  |                                    | capC | pgaptmp_003468 | BSU35890 |
|                  |                                    | capD | pgaptmp_002807 | BSU18410 |
|                  |                                    | capE | -              | -        |
|                  | Hyaluronic acid (HA) capsule       | hasA | -              | -        |
|                  |                                    | hasB | -              | -        |
|                  |                                    | hasC | -              | -        |
|                  | B. cereus exo-polysaccharide (BPS) | bpsA | -              | -        |
|                  |                                    | bpsB | -              | -        |
|                  |                                    | bpsC | -              | -        |
|                  |                                    | bpsD | -              | -        |
|                  |                                    | bpsE | -              | -        |
|                  |                                    | bpsF | -              | -        |
|                  |                                    | bpsG | -              | -        |
|                  |                                    | bpsH | -              | -        |
|                  |                                    | bpsX | -              | -        |
| Iron acquisition | Petrobactin                        | asbA | -              | -        |
|                  |                                    | asbB | -              | -        |
|                  |                                    | asbC | -              | -        |
|                  |                                    | asbD | -              | -        |
|                  |                                    | asbE | -              | -        |
|                  |                                    | asbF | -              | -        |
|                  | IlsA                               | ilsA | -              | -        |
|                  | Hal                                | hal  | -              | -        |
|                  | Bacillibactin                      | dhbA | pgaptmp_003945 | BSU32000 |
|                  |                                    | dhbB | pgaptmp_003948 | BSU31970 |

|                  |                                        |          |                                   |          |
|------------------|----------------------------------------|----------|-----------------------------------|----------|
|                  |                                        | dhbC     | pgaptmp_003946                    | BSU31990 |
|                  |                                        | dhbE     | pgaptmp_003947                    | BSU31980 |
|                  |                                        | dhbF     | pgaptmp_003949                    | BSU31960 |
| Regulation       | CheA/CheY(Listeria)                    | cheY     | pgaptmp_000985;<br>pgaptmp_002949 | -        |
|                  | Carbon storage regulator A(Legionella) | csrA     | pgaptmp_002493                    | -        |
|                  | PlcR-PapR quorum sensing               | papR     | -                                 | -        |
|                  |                                        | plcR     | -                                 | -        |
|                  | PagR-XO2                               | pagR-XO2 | -                                 | -        |
|                  | PagR-XO1                               | pagR-XO1 | -                                 | -        |
|                  | AtxA                                   | atxA     | -                                 | -        |
|                  | AcpAB                                  | acpA     | -                                 | -        |
|                  |                                        | acpB     | -                                 | -        |
| Secretion system | Type III secretion system(Chlamydia)   | cdsN     | pgaptmp_000975                    | -        |
|                  | Type VII secretion system              | -        | -                                 | -        |
|                  |                                        | -        | -                                 | -        |
|                  |                                        | essC     | -                                 | -        |
|                  |                                        | esxB     | -                                 | -        |
|                  |                                        | esxL     | -                                 | -        |
| Toxin            | Non-hemolytic enterotoxin (Nhe)        | nheA     | -                                 | -        |
|                  |                                        | nheB     | -                                 | -        |
|                  |                                        | nheC     | -                                 | -        |
|                  | Insecticidal crystalline toxins        | cry      | -                                 | -        |
|                  |                                        | cyt      | -                                 | -        |
|                  |                                        | vip      | -                                 | -        |
|                  | Hemolytic enterotoxin HBL              | hblA     | -                                 | -        |

|                  |                                                                     |              |                |          |
|------------------|---------------------------------------------------------------------|--------------|----------------|----------|
|                  |                                                                     | hblC         | -              | -        |
|                  |                                                                     | hblD         | -              | -        |
|                  | Hemolysin III homolog                                               | Undetermined | -              | -        |
|                  | Hemolysin III                                                       | hlyIII       | pgaptmp_000416 | BSU21790 |
|                  | Hemolysin II                                                        | hlyII        | -              | -        |
|                  | Cytotoxin K (Hemolysin IV)                                          | cytK         | -              | -        |
|                  | Certhrax                                                            | cer          | -              | -        |
|                  | Cereulide                                                           | cesA         | -              | -        |
|                  |                                                                     | cesB         | -              | -        |
|                  |                                                                     | cesC         | -              | -        |
|                  |                                                                     | cesD         | -              | -        |
|                  |                                                                     | cesH         | -              | -        |
|                  |                                                                     | cesP         | -              | -        |
|                  |                                                                     | cesT         | -              | -        |
|                  | Anthrolysin O/Cereolysin O/Hemolysin I                              | alo          | -              | -        |
|                  | Anthrax toxin                                                       | cya          | -              | -        |
|                  |                                                                     | lef          | -              | -        |
|                  |                                                                     | pagA         | -              | -        |
| Acid resistance  | Urease(Helicobacter)                                                | ureB         | pgaptmp_003552 | -        |
| Antiphagocytosis | Capsule(Enterococcus)                                               |              | pgaptmp_003099 | -        |
|                  | Capsular polysaccharide(Vibrio)                                     | wcaJ         | pgaptmp_000781 | -        |
| Copper uptake    | Copper exporter(Mycobacterium)                                      | ctpV         | pgaptmp_002083 | -        |
| Iron uptake      | Periplasmic binding protein-dependent ABC transport systems(Vibrio) | vctC         | pgaptmp_001038 | -        |
|                  | Mycobactin(Mycobacterium)                                           | mbtH         | pgaptmp_003950 | -        |
|                  | Achromobactin biosynthesis and transport(Pseudomonas)               | cbrD         | pgaptmp_002584 | -        |

|                            |                                                    |      |                |   |
|----------------------------|----------------------------------------------------|------|----------------|---|
| Peptidoglycan modification | OatA(Listeria)                                     | oatA | pgaptmp_001971 | - |
| Stress adaptation          | Catalase(Neisseria)                                | katA | pgaptmp_004191 | - |
| Surface protein anchoring  | Lipoprotein-specific signal peptidase II(Listeria) | lspA | pgaptmp_000896 | - |
|                            | Lipoprotein diacylglycerol transferase(Listeria)   | lgt  | pgaptmp_000857 | - |

| VFclass        | Virulence factors                                       | Related genes | PY2.3 (Prediction)                                                      | B.subtilis subsp. subtilis str. 168 |
|----------------|---------------------------------------------------------|---------------|-------------------------------------------------------------------------|-------------------------------------|
|                |                                                         |               | draft (draft)                                                           | chromosome (NC_000964)              |
| Adherence      | BslA                                                    | bslA          | -                                                                       | -                                   |
| Enzyme         | Sphingomyelinase (SMase)                                | sph           | -                                                                       | -                                   |
|                | Phosphatidylinositol-specific phospholipase C (PI-PLC)  | piplc         | -                                                                       | -                                   |
|                | Phosphatidylcholine-preferring phospholipase C (PC-PLC) | plcA          | -                                                                       | -                                   |
|                | Immune inhibitor A metalloproteinase                    | Undetermined  | -                                                                       | -                                   |
|                |                                                         | inhA          | -                                                                       | -                                   |
| Immune evasion | Polysaccharide capsule                                  | Undetermined  | pgaptmp_000306;<br>pgaptmp_002467;<br>pgaptmp_002468;<br>pgaptmp_002711 | -                                   |
|                | Polyglutamic acid capsule                               | capA          | pgaptmp_002428                                                          | BSU35880                            |
|                |                                                         | capB          | pgaptmp_002430                                                          | BSU35900                            |
|                |                                                         | capC          | pgaptmp_002429                                                          | BSU35890                            |
|                |                                                         | capD          | pgaptmp_001205                                                          | BSU18410                            |
|                |                                                         | capE          | -                                                                       | -                                   |
|                | Hyaluronic acid (HA) capsule                            | hasA          | -                                                                       | -                                   |
|                |                                                         | hasB          | -                                                                       | -                                   |
|                |                                                         | hasC          | -                                                                       | -                                   |
|                | B. cereus exo-polysaccharide (BPS)                      | bpsA          | -                                                                       | -                                   |

|                  |                          |          |                |          |
|------------------|--------------------------|----------|----------------|----------|
|                  |                          | bpsB     | -              | -        |
|                  |                          | bpsC     | -              | -        |
|                  |                          | bpsD     | -              | -        |
|                  |                          | bpsE     | -              | -        |
|                  |                          | bpsF     | -              | -        |
|                  |                          | bpsG     | -              | -        |
|                  |                          | bpsH     | -              | -        |
|                  |                          | bpsX     | -              | -        |
| Iron acquisition | Petrobactin              | asbA     | -              | -        |
|                  |                          | asbB     | -              | -        |
|                  |                          | asbC     | -              | -        |
|                  |                          | asbD     | -              | -        |
|                  |                          | asbE     | -              | -        |
|                  |                          | asbF     | -              | -        |
|                  | IlsA                     | ilsA     | -              | -        |
|                  | Hal                      | hal      | -              | -        |
|                  | Bacillibactin            | dhbA     | pgaptmp_003354 | BSU32000 |
|                  |                          | dhbB     | pgaptmp_003351 | BSU31970 |
|                  |                          | dhbC     | pgaptmp_003353 | BSU31990 |
|                  |                          | dhbE     | pgaptmp_003352 | BSU31980 |
|                  |                          | dhbF     | pgaptmp_003350 | BSU31960 |
| Regulation       | PlcR-PapR quorum sensing | papR     | -              | -        |
|                  |                          | plcR     | -              | -        |
|                  | PagR-XO2                 | pagR-XO2 | -              | -        |
|                  | PagR-XO1                 | pagR-XO1 | -              | -        |
|                  | AtxA                     | atxA     | -              | -        |

|                  |                                 |              |                |          |
|------------------|---------------------------------|--------------|----------------|----------|
|                  | AcpAB                           | acpA         | -              | -        |
|                  |                                 | acpB         | -              | -        |
| Secretion system | Type VII secretion system       | -            | -              | -        |
|                  |                                 | -            | -              | -        |
|                  |                                 | essC         | -              | -        |
|                  |                                 | esxB         | -              | -        |
|                  |                                 | esxL         | -              | -        |
| Toxin            | Non-hemolytic enterotoxin (Nhe) | nheA         | -              | -        |
|                  |                                 | nheB         | -              | -        |
|                  |                                 | nheC         | -              | -        |
|                  | Insecticidal crystalline toxins | cry          | -              | -        |
|                  |                                 | cyt          | -              | -        |
|                  |                                 | vip          | -              | -        |
|                  | Hemolytic enterotoxin HBL       | hblA         | -              | -        |
|                  |                                 | hblC         | -              | -        |
|                  |                                 | hblD         | -              | -        |
|                  | Hemolysin III homolog           | Undetermined | -              | -        |
|                  | Hemolysin III                   | hlyIII       | pgaptmp_001084 | BSU21790 |
|                  | Hemolysin II                    | hlyII        | -              | -        |
|                  | Cytotoxin K (Hemolysin IV)      | cytK         | -              | -        |
|                  | Certhrax                        | cer          | -              | -        |
|                  | Cereulide                       | cesA         | -              | -        |
|                  |                                 | cesB         | -              | -        |
|                  |                                 | cesC         | -              | -        |
|                  |                                 | cesD         | -              | -        |
|                  |                                 | cesH         | -              | -        |

|                         |                                        |      |                |   |
|-------------------------|----------------------------------------|------|----------------|---|
|                         | Anthrolysin O/Cereolysin O/Hemolysin I | cesP | -              | - |
|                         |                                        | cesT | -              | - |
|                         |                                        | alo  | -              | - |
|                         | Anthrax toxin                          | cya  | -              | - |
|                         |                                        | lef  | -              | - |
|                         |                                        | pagA | -              | - |
| Cell surface components | GPL locus(Mycobacterium)               | mbtH | pgaptmp_003349 | - |

**Table S5a. List of identified secondary metabolite cluster of isolate BP20.15 using strictness ‘strict’**

| Region      | Type                        | From    | To      | Most similar known cluster                                    | Similarity |
|-------------|-----------------------------|---------|---------|---------------------------------------------------------------|------------|
| Region 1.1  | T3PKS                       | 315,873 | 356,970 | 1-carbapen-2-em-3-carboxylic acid; Other                      | ---        |
| Region 1.2  | terpene                     | 405,447 | 427,345 |                                                               |            |
| Region 4.1  | NRPS, betalactone           | 1       | 27,594  | Fengycin; NRP                                                 | 80%        |
| Region 4.2  | NRPS, transAT-PKS, T3PKS    | 99,515  | 204,780 | Bacillaene; Polyketide+NRP                                    | 100%       |
| Region 6.1  | Sactipeptide                | 196,374 | 217,985 | subtilisin A; RiPP:Thiopeptide                                | 100%       |
| Region 7.1  | NRPS                        | 1       | 28,058  | Surfactin; NRP:Lipopeptide                                    | 39%        |
| Region 7.2  | Sactipeptide, ranthipeptide | 161,078 | 184,031 | sporulation killing factor; RiPP:Head-to-tailcyclized peptide | 100%       |
| Region 8.1  | NRP-metallophore, NRPS      | 77,003  | 128,780 | Bacillibactin; NRP                                            | 100%       |
| Region 11.1 | CDPS                        | 128,855 | 144,076 | Pulcherriminic acid; Other                                    | 100%       |
| Region 13.1 | NRPS                        | 1       | 25,377  | Surfactin; NRP:Lipopeptide                                    | 43%        |
| Region 16.1 | Other                       | 1       | 35,408  | Bacilysin; Other                                              | 100%       |

|                                                                                                              |                              |         |         |                            |      |
|--------------------------------------------------------------------------------------------------------------|------------------------------|---------|---------|----------------------------|------|
| Region 19.1                                                                                                  | terpene                      | 26,099  | 46,902  |                            |      |
| Region 36.1                                                                                                  | NRPS                         | 1       | 13,319  | Plipastatin; NRP           | 38%  |
| Region 39.1                                                                                                  | NRPS                         | 1       | 10,270  | Plipastatin; NRP           | 23%  |
| Region 40.1                                                                                                  | NRPS                         | 1       | 9,571   | Surfactin; NRP:Lipopeptide | 8%   |
| <b>Table S5b. List of identified secondary metabolite cluster of isolate PY2.3 using strictness 'strict'</b> |                              |         |         |                            |      |
| Region 1.1                                                                                                   | transAT-PKS                  | 27,584  | 115,813 | macrolactin H; Polyketide  | 100% |
| Region 1.2                                                                                                   | terpene                      | 463,273 | 484,013 |                            |      |
| Region 2.1                                                                                                   | transAT-PKS                  | 530,805 | 564,859 | Difficidin; Polyketide     | 46%  |
| Region 3.1                                                                                                   | betalactone,NRPS,transAT-PKS | 1       | 87,040  | Fengycin; NRP              | 73%  |
| Region 3.2                                                                                                   | transAT-PKS, NRPS, T3PKS     | 156,317 | 258,960 | Bacillaene Polyketide+NRP  | 100% |
| Region 4.1                                                                                                   | Other                        | 175,848 | 217,266 | Bacilysin; Other           | 100% |
| Region 5.1                                                                                                   | NRPS                         | 55,796  | 121,203 | Surfactin NRP:Lipopeptide  | 91%  |
| Region 7.1                                                                                                   | NRP-metallophore, NRPS       | 73,402  | 125,137 | Bacillibactin NRP          | 100% |
| Region 9.1                                                                                                   | T3PKS                        | 1       | 30,402  |                            |      |
| Region 12.1                                                                                                  | terpene                      | 61,208  | 83,091  |                            |      |
| Region 13.1                                                                                                  | NRPS                         | 1       | 39,930  |                            |      |
| Region 18.1                                                                                                  | NRPS                         | 1       | 12,626  | Plipastatin; NRP           | 30%  |
| Region 19.1                                                                                                  | NRPS                         | 1       | 9,332   | Fengycin; NRP              | 13%  |
