# Supplementary material for: In Silico Safety Assessment of Bacillus Isolated from Polish Bee Pollen and Bee Bread as Novel Probiotic Candidates
Source: MDPI journal article supplement (doi:10.3390/ijms25010666), 2024-01-04
Supplement: s1 [file s1]

# ***In Silico* Safety Assessment of *Bacillus* isolated from Polish Bee Pollen and Bee Bread as Novel Probiotic Candidates**

Ahmer Bin Hafeez<sup>1</sup>; Karolina Pełka<sup>1</sup>; Randy Worobo<sup>2</sup>; Piotr Szweda<sup>1\*</sup>

1 - Department of Pharmaceutical Technology and Biochemistry, Faculty of Chemistry, Gdańsk University of Technology, ul. G. Narutowicza 11/12, 80-233 Gdańsk, Poland;

2 - Department of Food Science, Cornell University, Ithaca, NY 14853, USA

Ahmer Bin Hafeez – e-mail: [ahmer.bin.hafeez@pg.edu.pl](mailto:ahmer.bin.hafeez@pg.edu.pl); ORCID: 0000-0002-8712-5898

Karolina Pełka – e-mail: [karolina.pelka@pg.edu.pl](mailto:karolina.pelka@pg.edu.pl); ORCID: 0000-0003-2523-8165

Randy Worobo – e-mail: [rww8@cornell.edu](mailto:rww8@cornell.edu); ORCID: 0000-0002-5211-3125

Piotr Szweda – email: [piotr.szweda@pg.edu.pl](mailto:piotr.szweda@pg.edu.pl); ORCID: 0000-0001-8291-5148\*

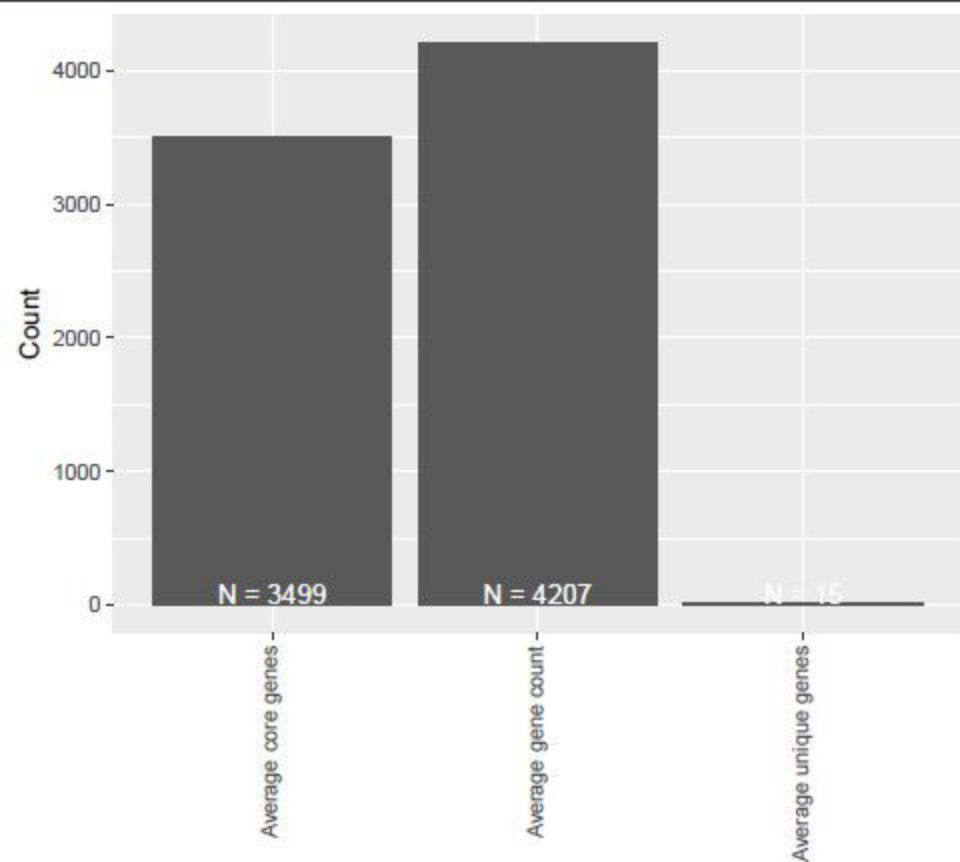

Total number of genomes:  
180

Number of analyzed genes:  
752925

Total orthologous groups  
10810

Total unique genes  
2664

**Figure S1.** Number of Average core genes, average gene count, and average unique genes present in the *B. subtilis* pangenome



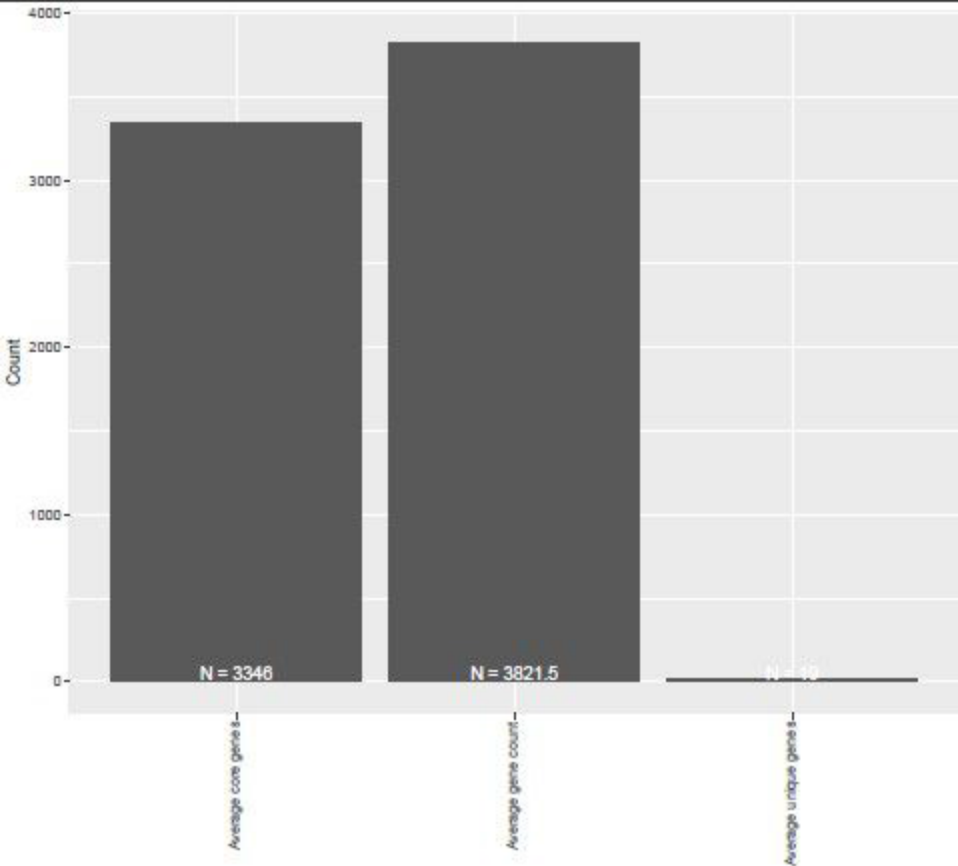

Total number of genomes:  
204

Number of analyzed genes:  
790409

Total orthologous groups  
11759

Total unique genes  
3831

**Figure S2.** Number of Average core genes, average gene count, and average unique genes present in the *B. velezensis* pangenome

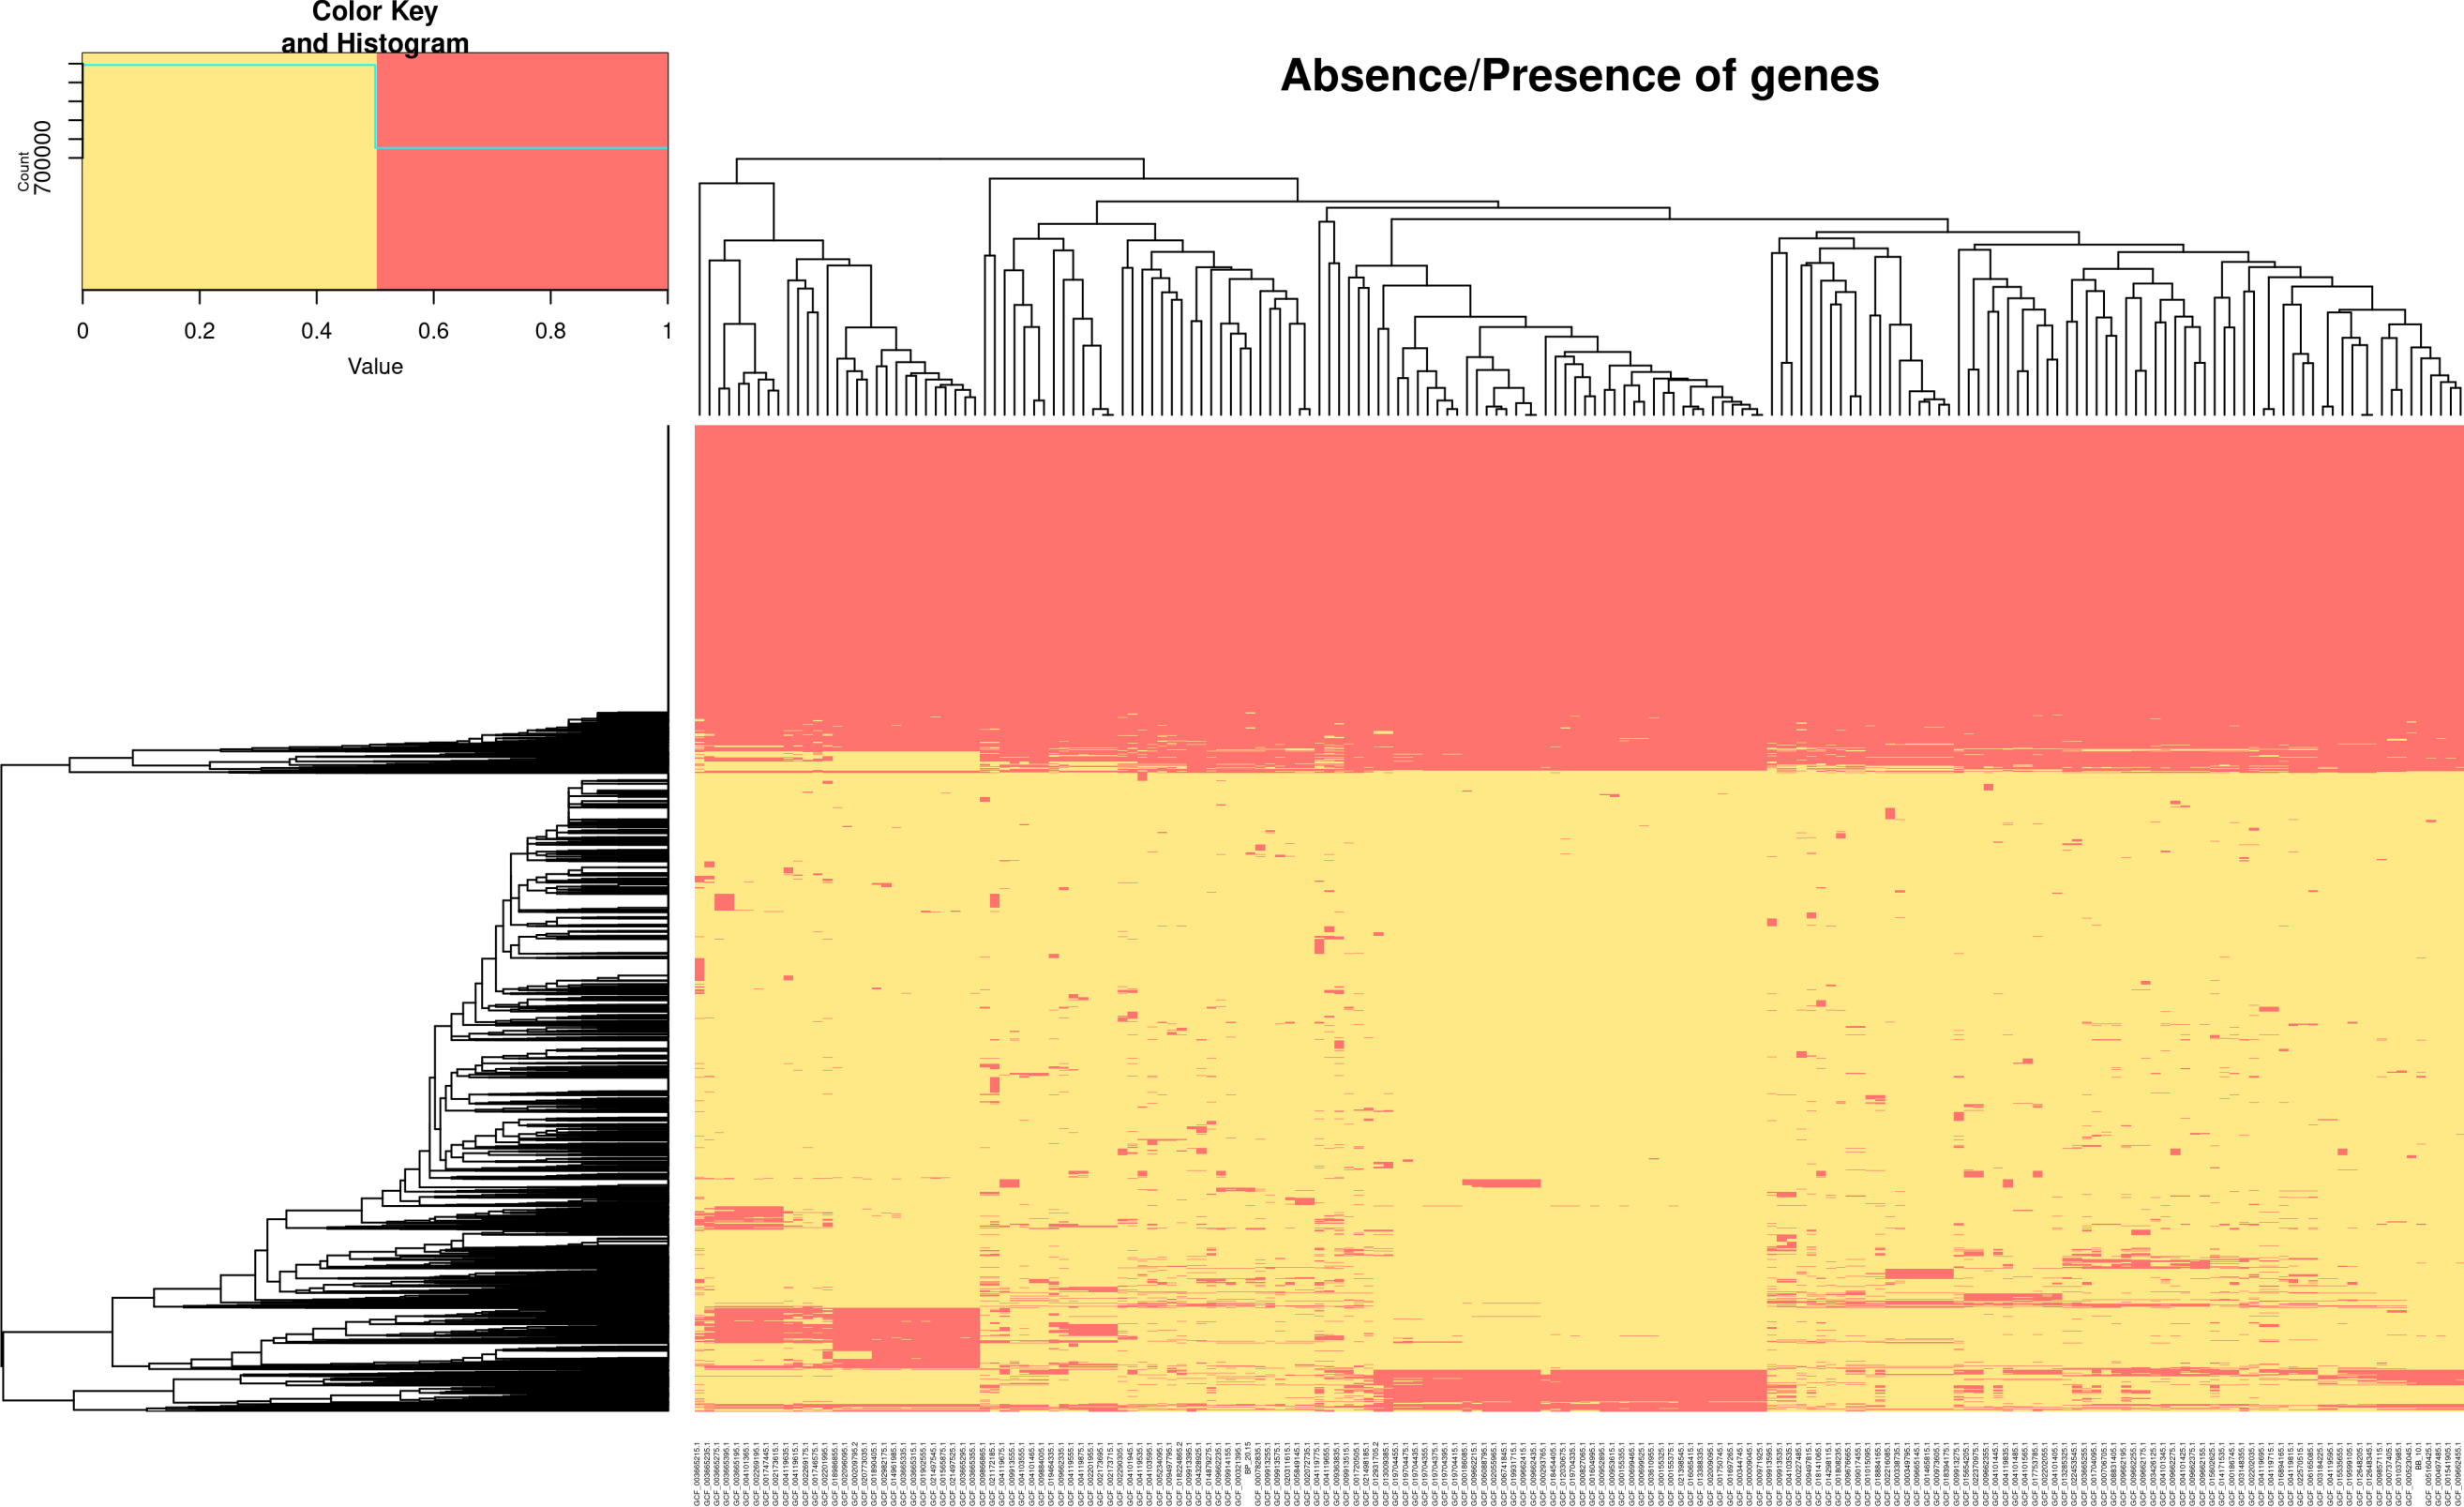



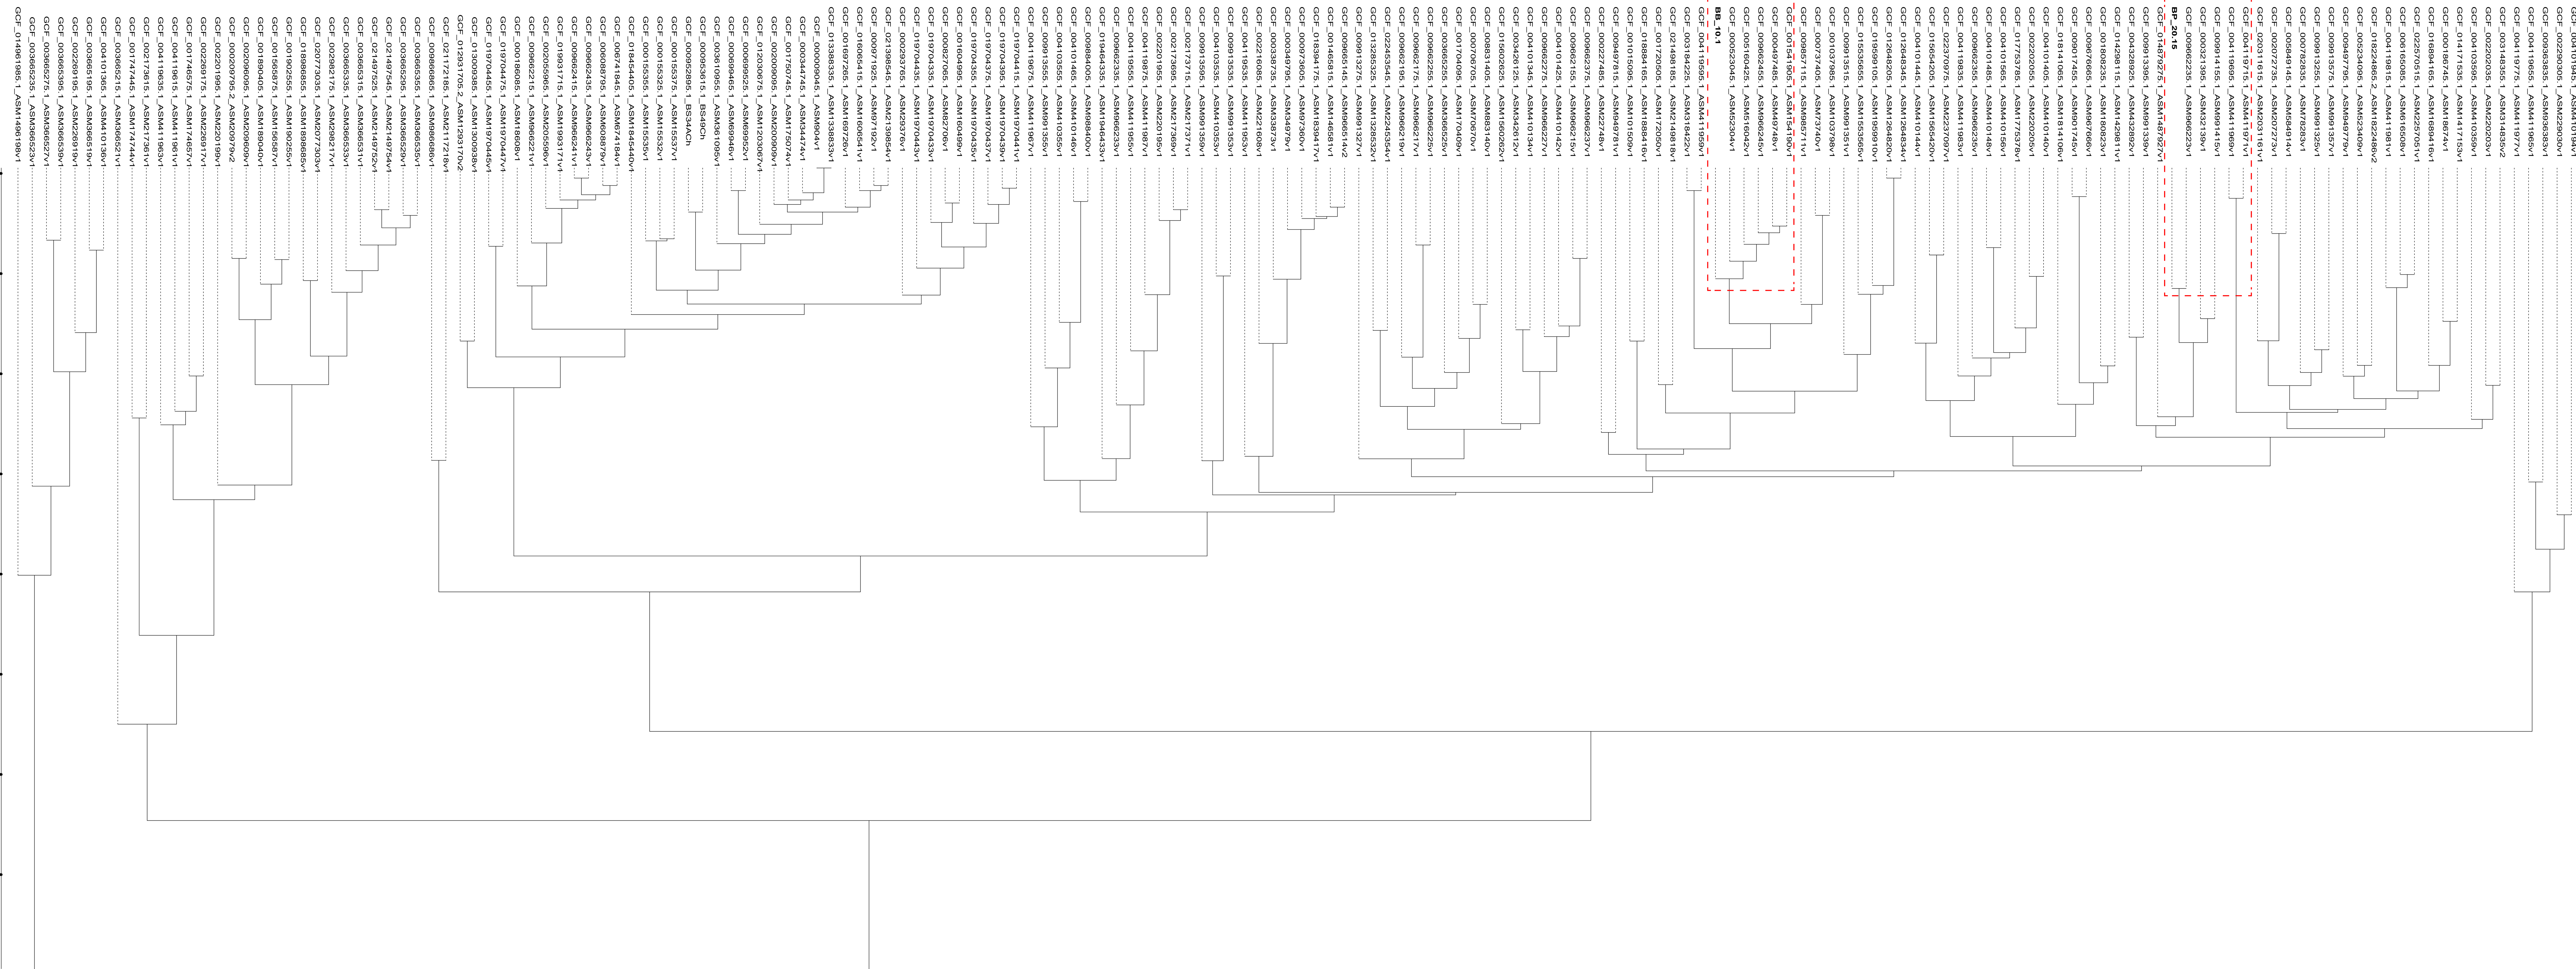

**Figure S4a.** The phylogenetic inference based on the whole genome variation of isolates BB10.1, BP20.15.



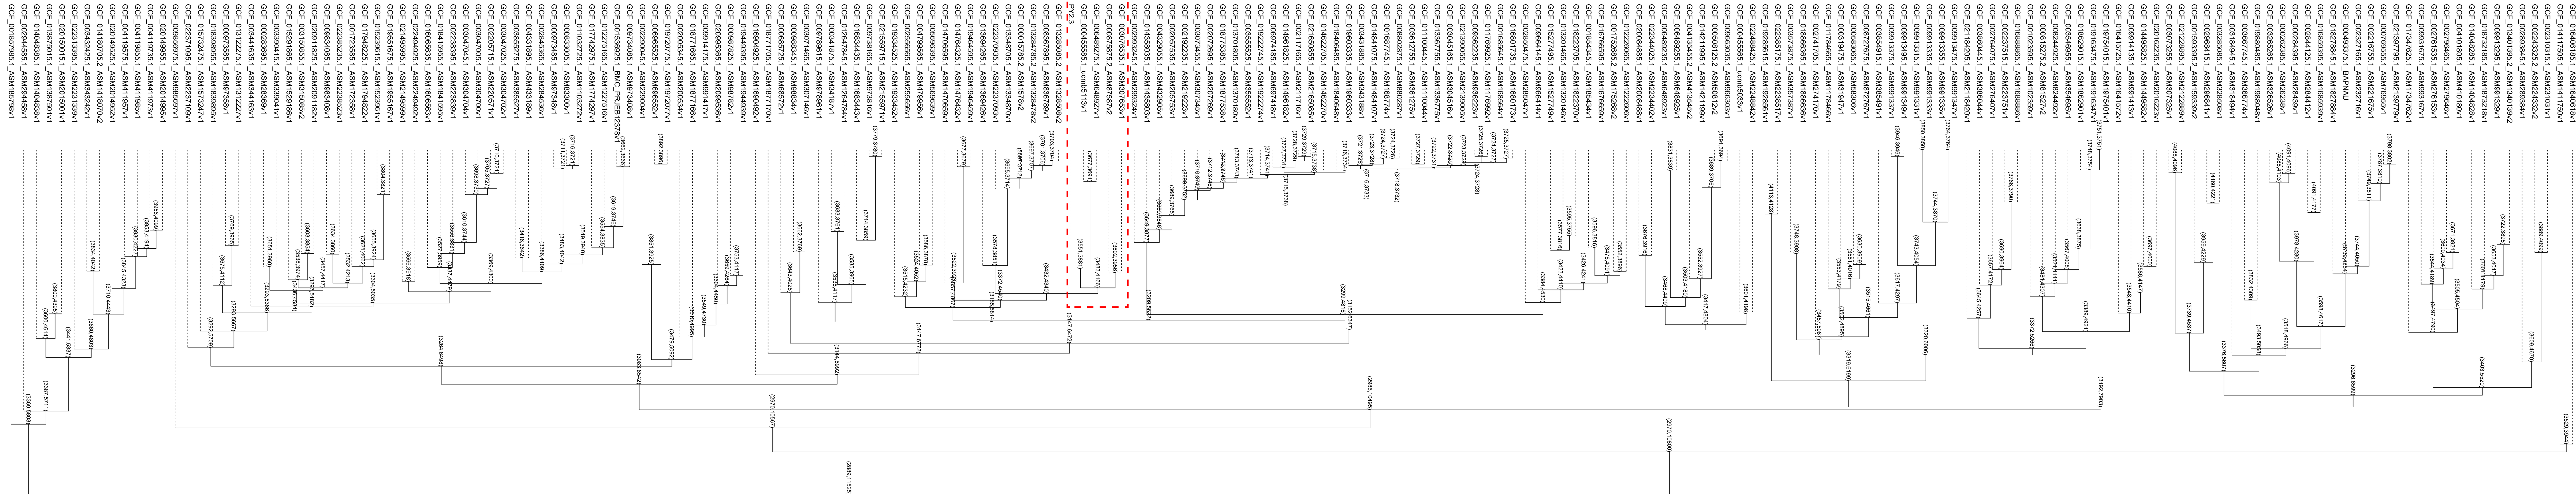

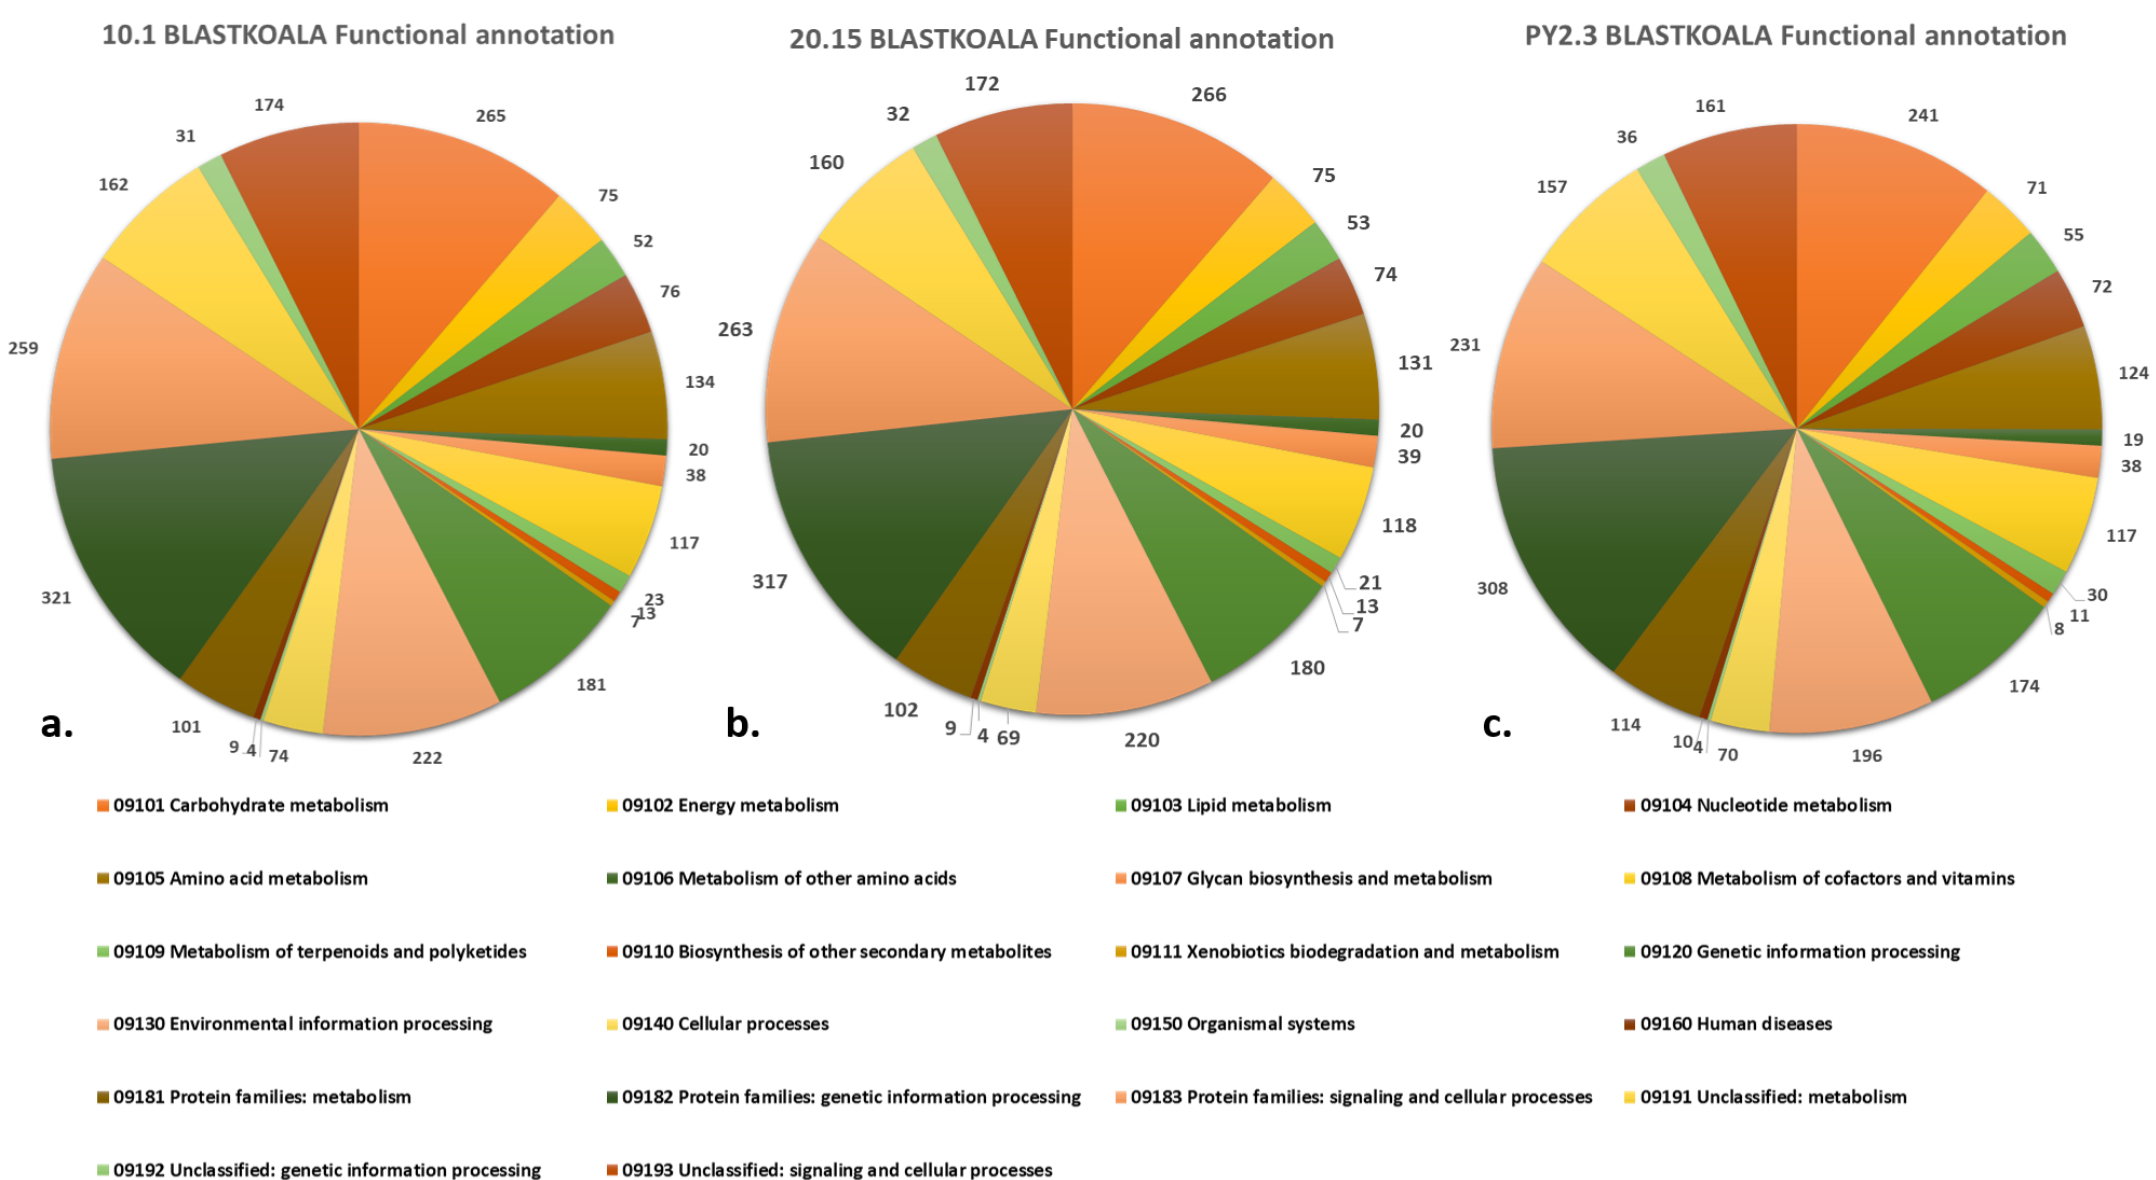

**Figure S5 .** The KEGG functional annotation by BLASTKOALA and categorization into 22 different functional categories. a) 60% of the annotated sequences from isolate 10.1 b) 61.2% annotated sequences from isolate 20.15 c) 62.6% annotated sequences from isolate PY2.3. The color scheme and code at the bottom represent the specific functional category of annotated genes.
